# Supplementary material for: The oocyte zinc transporter Slc39a10/Zip10 is a regulator of zinc sparks during fertilization in mice
Source: eLife journal article supplement (doi:10.7554/elife.106616), 2025-06-03
Supplement: fig4-data1 [file Figure 4_Source Data 1.pdf › Figure 4_Source Data 1.pdf]

ZP2

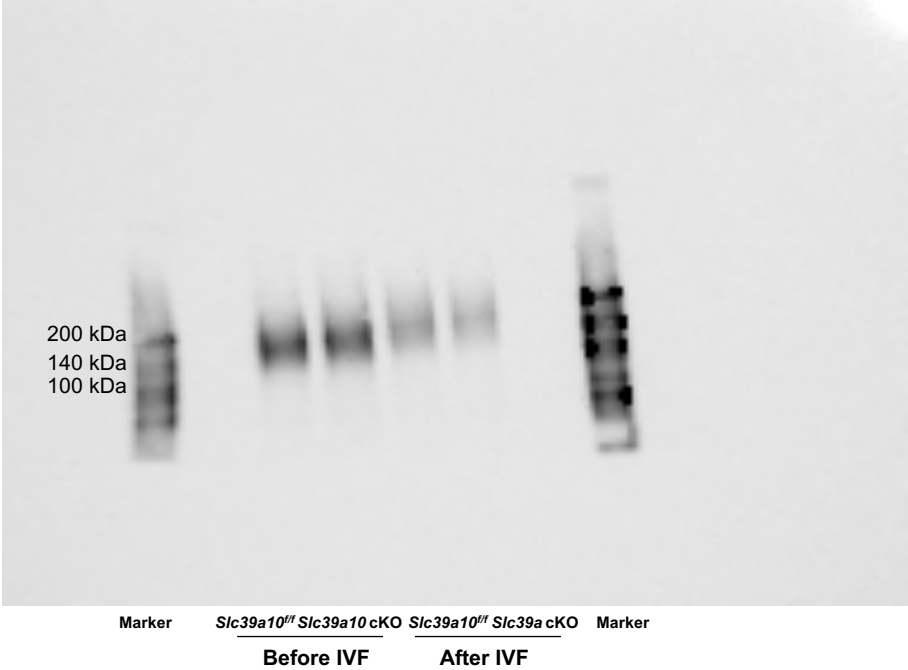

$\beta$ -actin

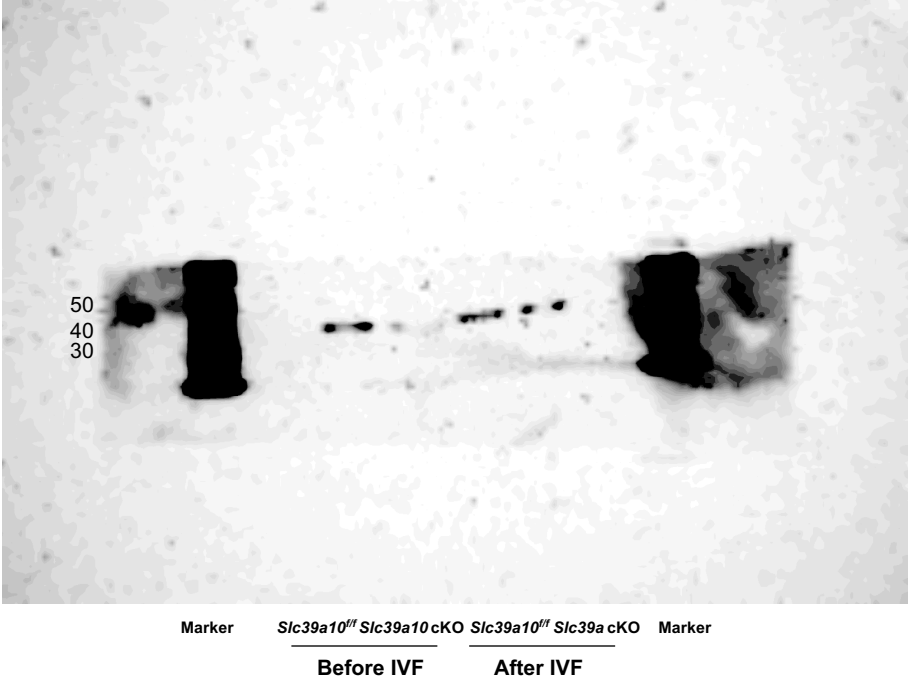

**Figure 4-Source data 1.** Original membranes corresponding to Figure 4D. Biotinylated Protein Ladder Detection Pack ( #7727; Cell Signaling Technology) were employed as molecular weight marker. After blocking in WB, one membrane was cleaved at the 50-80 kDa position, with the upper membrane reacted with ZP antibody and the lower membrane reacted with  $\beta$ -actin antibody.
